# Supplementary material for: Aqueous phase processing of secondary organic aerosol from isoprene photooxidation
Source: Copernicus journal article supplement (doi:10.5194/acp-12-5879-2012), 2012-07-10
Supplement: Supplementary file 1 [file acp-12-5879-2012-supplement.pdf]

## Supplementary information

### S1: Estimation of the dissolved organic mass (DOM) concentrations in aqueous solutions after SOA extraction

The DOM concentrations in aqueous solutions were calculated as follows:

$$DOM(mg/L) = \frac{1}{V_{water}} \times \frac{V_{sample}}{t_{sample}} \times \sum_{t_i} \left( \frac{m}{V} \right)_{t_i} \times \Delta t_i \times 80\%$$

Where:

- $V_{water}$  = volume of water used for SOA extraction (160 mL of water)
- $V_{sample}$  = volume of {air + particles} sampled from the chamber (0.720 m<sup>3</sup> of air)
- $t_{sample}$  = Sampling duration (2 hours)

-  $\frac{V_{sample}}{t_{sample}} \times \sum_{t_i} \left( \frac{m}{V} \right)_{t_i} \times \Delta t_i$  = total mass of particles sampled on the filter ( $\mu\text{g}$ ). The HR-

AMS provided a mass of organic particles per m<sup>3</sup> every 2 minutes  $\left( \frac{m}{V} \right)_{t_i}$ . Integrating

this data during the filter collection time, multiplied by  $\frac{V_{sample}}{t_{sample}}$ , yields the total mass of

particles sampled on the filter.

- The collection efficiency of SOA in water extracts was approximately 80%, as determined during previous experiments for SOA derived from  $\alpha$ -pinene and isoprene.

1

**(a) - Isoprene (exp 1)**

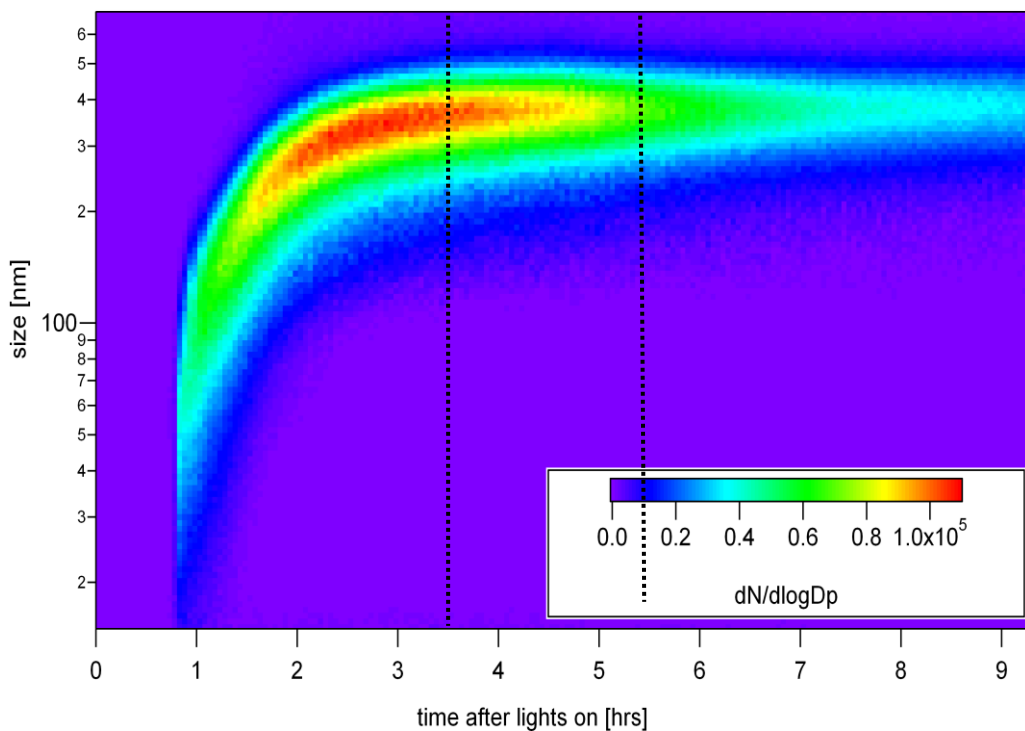

2

3

4

**(b) - Isoprene (exp 2)**

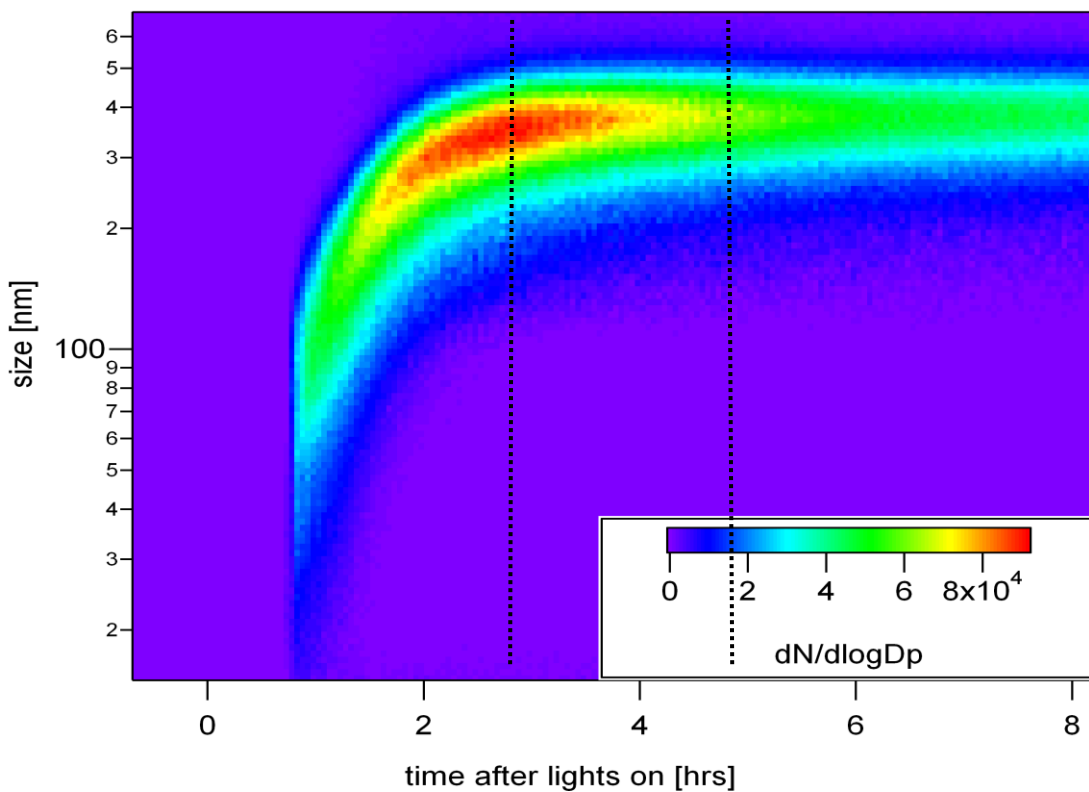

5

6

7 **Figure S1:** Evolution of the number size distribution (analyzed by SMPS) of the SOA formed  
8 in the smog chamber as a function of the reaction time during the gas-phase photooxidation of  
9 (a): isoprene experiment 1 and (b): experiment 2. The dashed lines indicate the filter sampling  
10 start and end times.

11

1

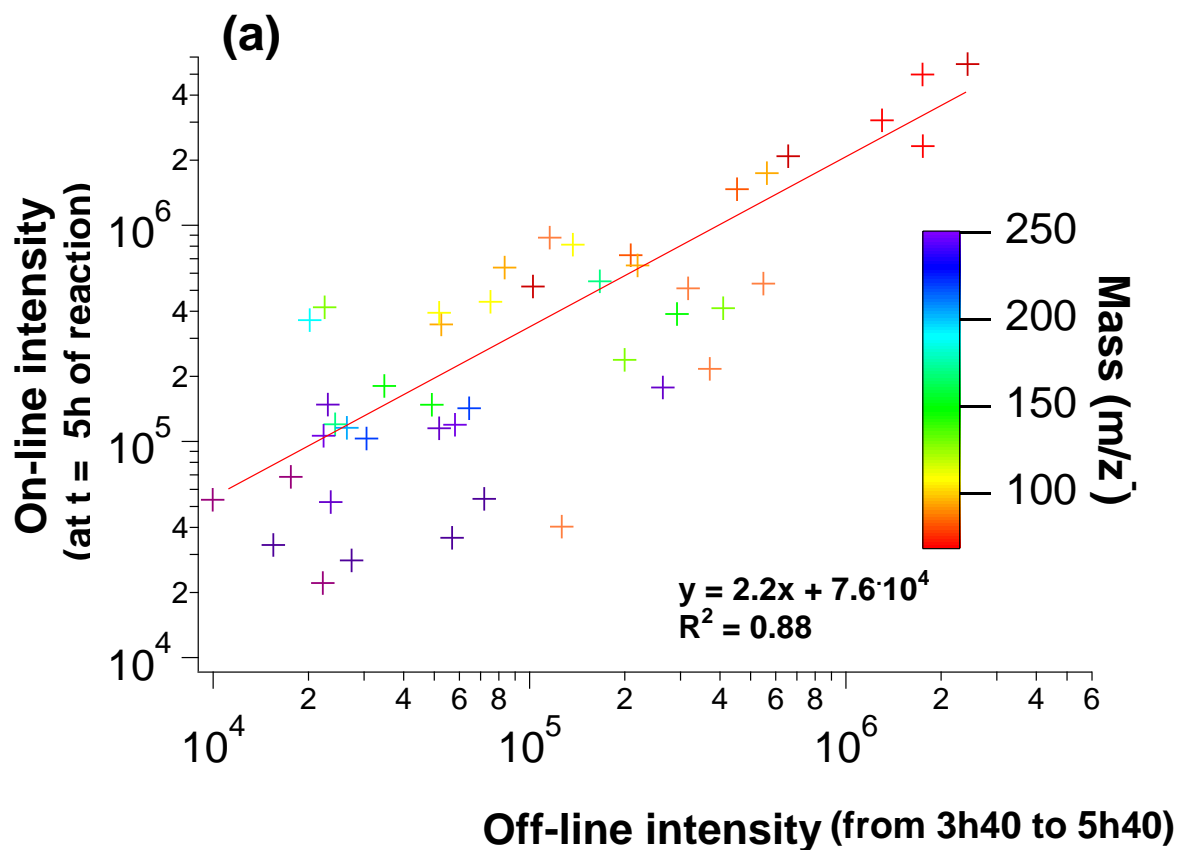

2  
3  
4

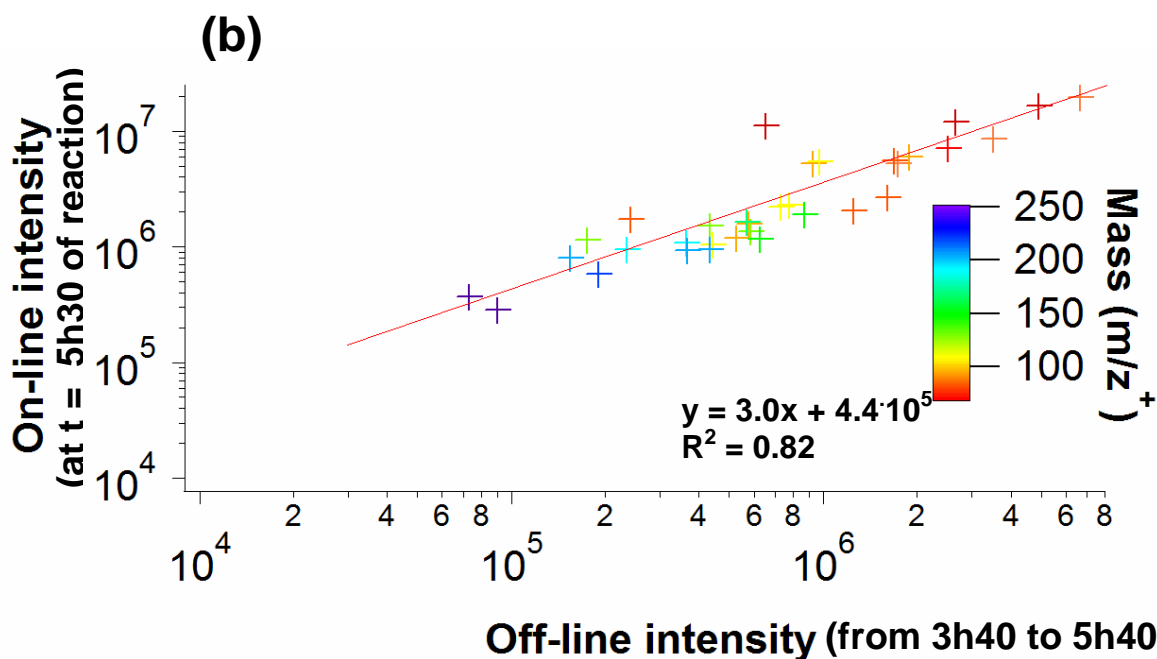

5  
6  
7  
8  
9  
10  
11

**Figure S2:** TD-API-AMS measurements (a) in the negative mode and (b) in the positive mode of the chemical composition of SOA formed during isoprene photooxidation (experiment 1). Correlation between on-line (direct on-line measurement in the smog chamber) and off-line analysis (nebulization of “control” samples).

1  
2  
3  
4  
5  
6  
7  
8  
9  
10  
11  
12  
13  
14  
15  
16  
17  
18  
19  
20  
21  
22  
23  
24  
25  
26  
27  
28  
29  
30  
31  
32  
33  
34  
35  
36  
37  
38  
39  
40  
41  
42  
43  
44  
45  
46  
47  
48  
49  
50  
51

“dark H<sub>2</sub>O<sub>2</sub>”– “control” samples: Ions’ formation

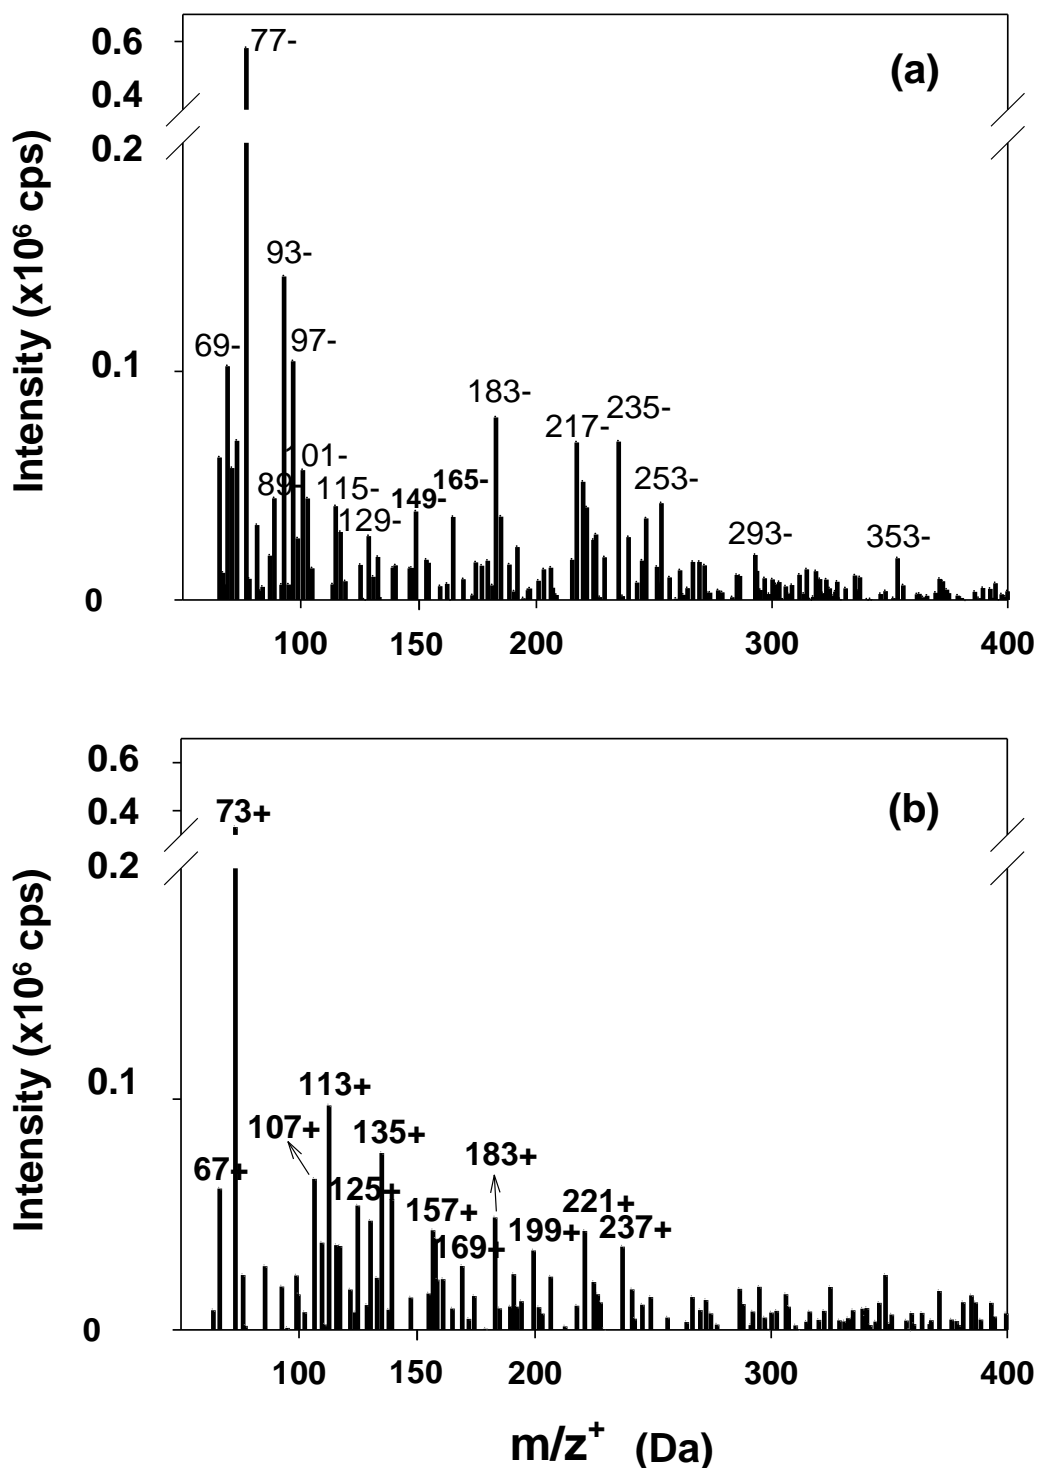

Figure S3 : Isoprene experiment (1). APCI-MS measurements of aqueous solutions by direct infusion of liquid solutions, in the negative mode (a) and in the positive mode (b). Mass spectra differences between “dark H<sub>2</sub>O<sub>2</sub>” samples and “control” samples show the ions formed during dark oxidation by H<sub>2</sub>O<sub>2</sub> in the aqueous phase.

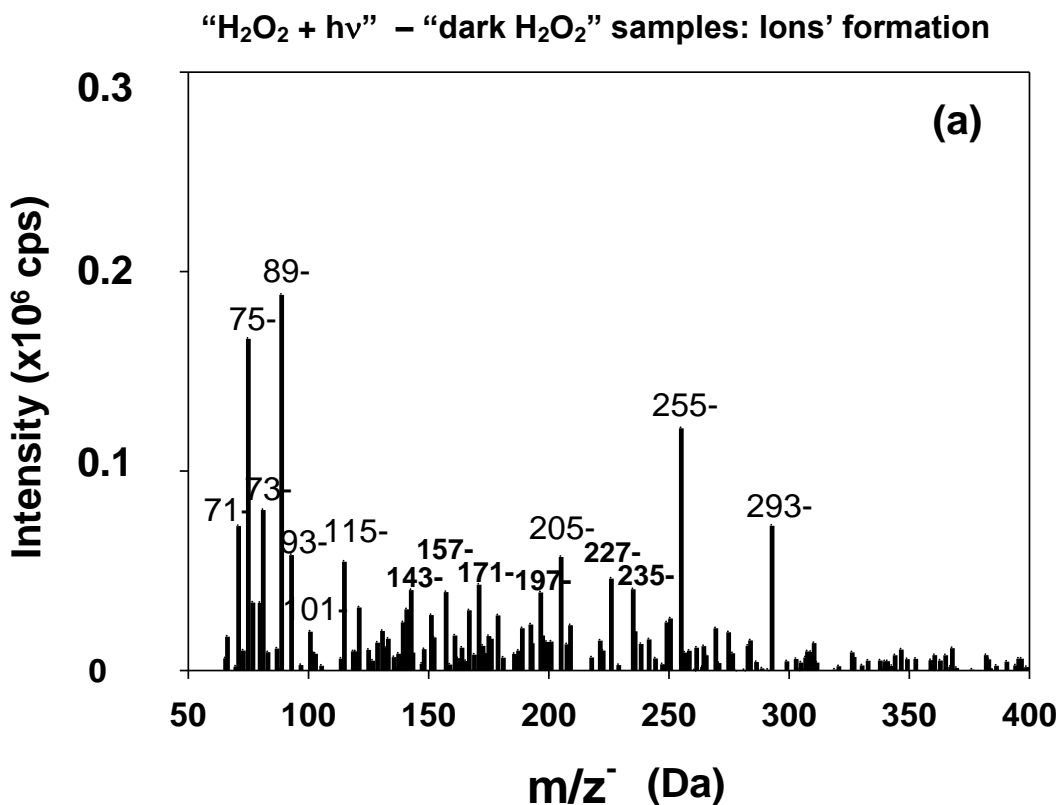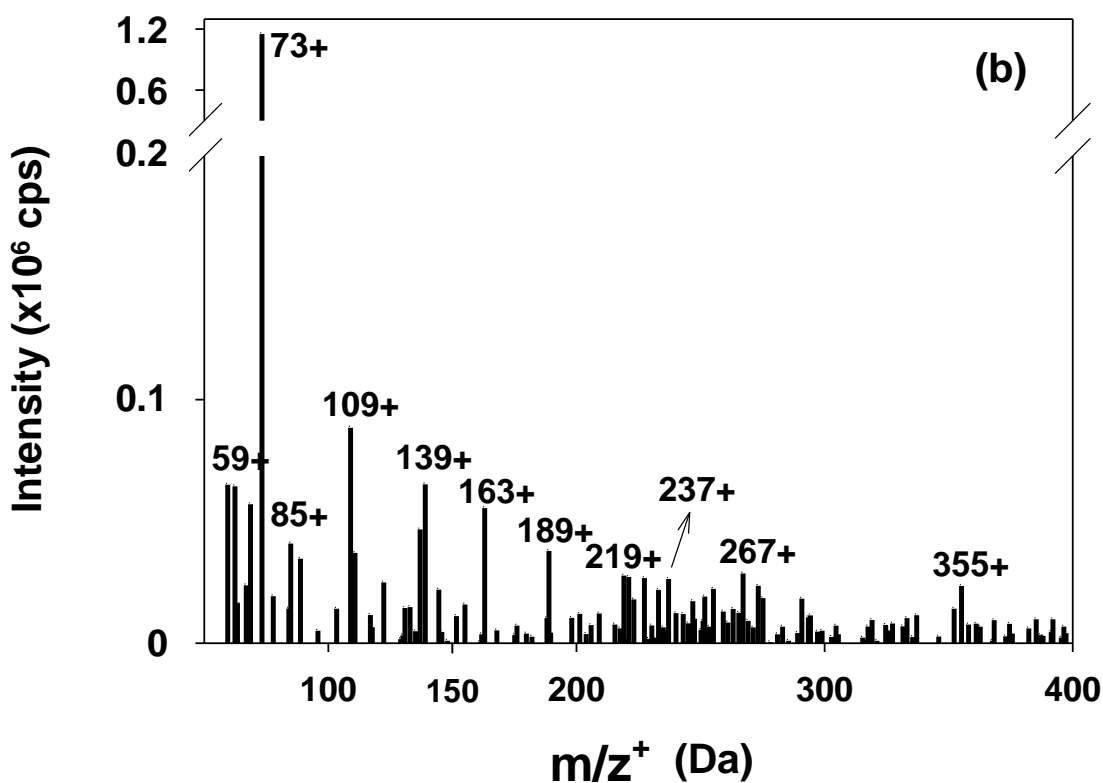

47 **Figure S4** : Isoprene experiment (1). APCI-MS measurements of aqueous solutions by direct  
48 infusion of liquid solutions, in the negative mode (a) and in the positive mode (b). Mass  
49 spectra differences between “H<sub>2</sub>O<sub>2</sub> + hv” samples and “dark H<sub>2</sub>O<sub>2</sub>” samples show the ions  
50 formed during the aqueous phase OH-oxidation of the solution.

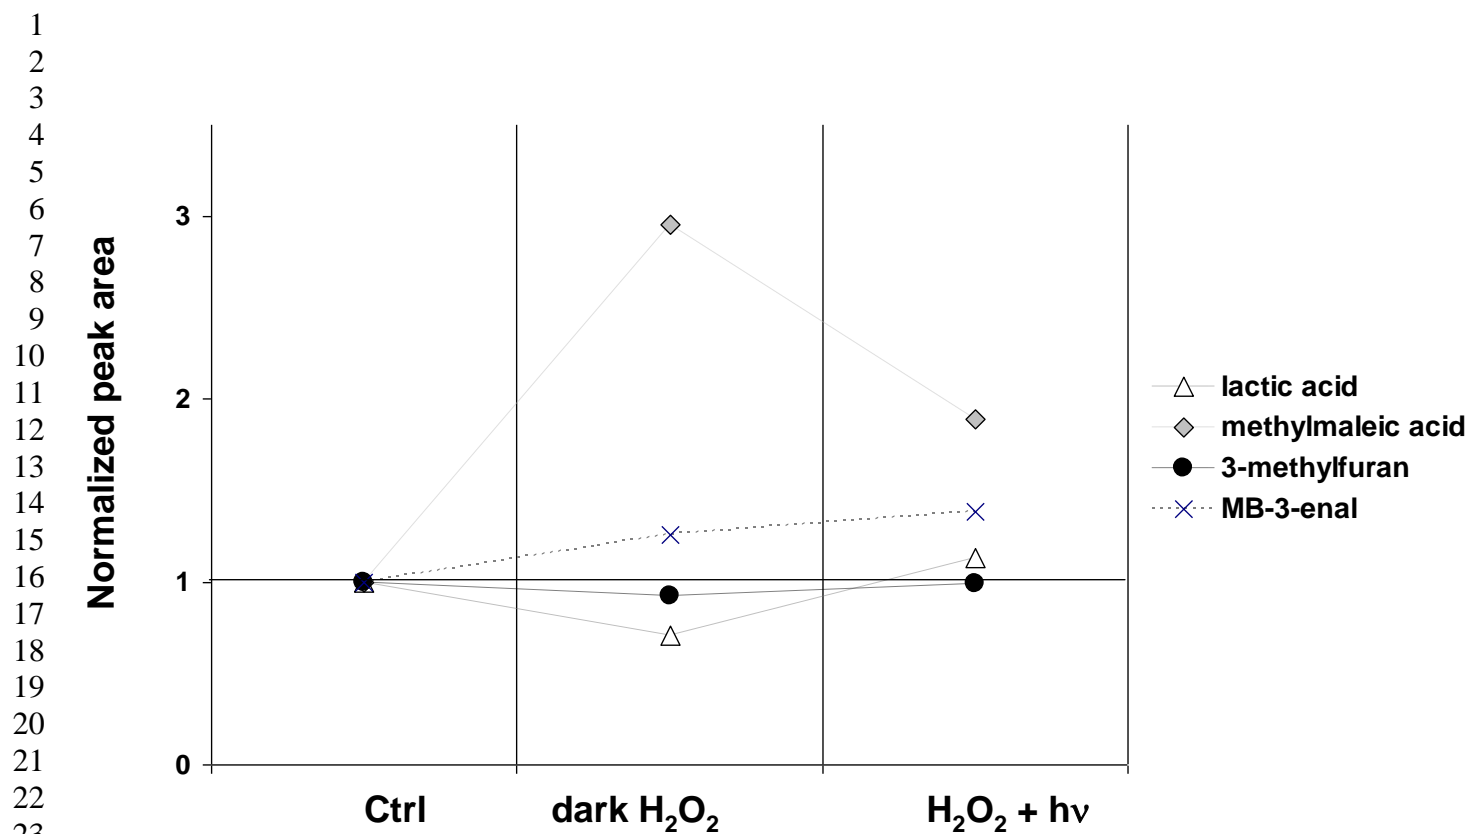

26 **Figure S5:** Evolution of four identified and quantified reaction products from “control”, “dark  
 27 H<sub>2</sub>O<sub>2</sub>” to “H<sub>2</sub>O<sub>2</sub> + hv” samples in the mass range 60 – 120 Da (experiment 2). All peak areas  
 28 were normalized to “control” samples. MB-3-enal = 3-methylbut-3-enal. Quantification was  
 29 performed using the conditions indicated in Table 1.  
 30
